# Supplementary material for: Neurotropism and behavioral changes associated with Zika infection in the vector Aedes aegypti
Source: PubMed Central journal article supplement (PMC5915379; doi:10.1038/s41426-018-0069-2), 2018-04-25
Supplement: 41426_2018_69_MOESM1_ESM.pdf [file 41426_2018_69_MOESM1_ESM.pdf]

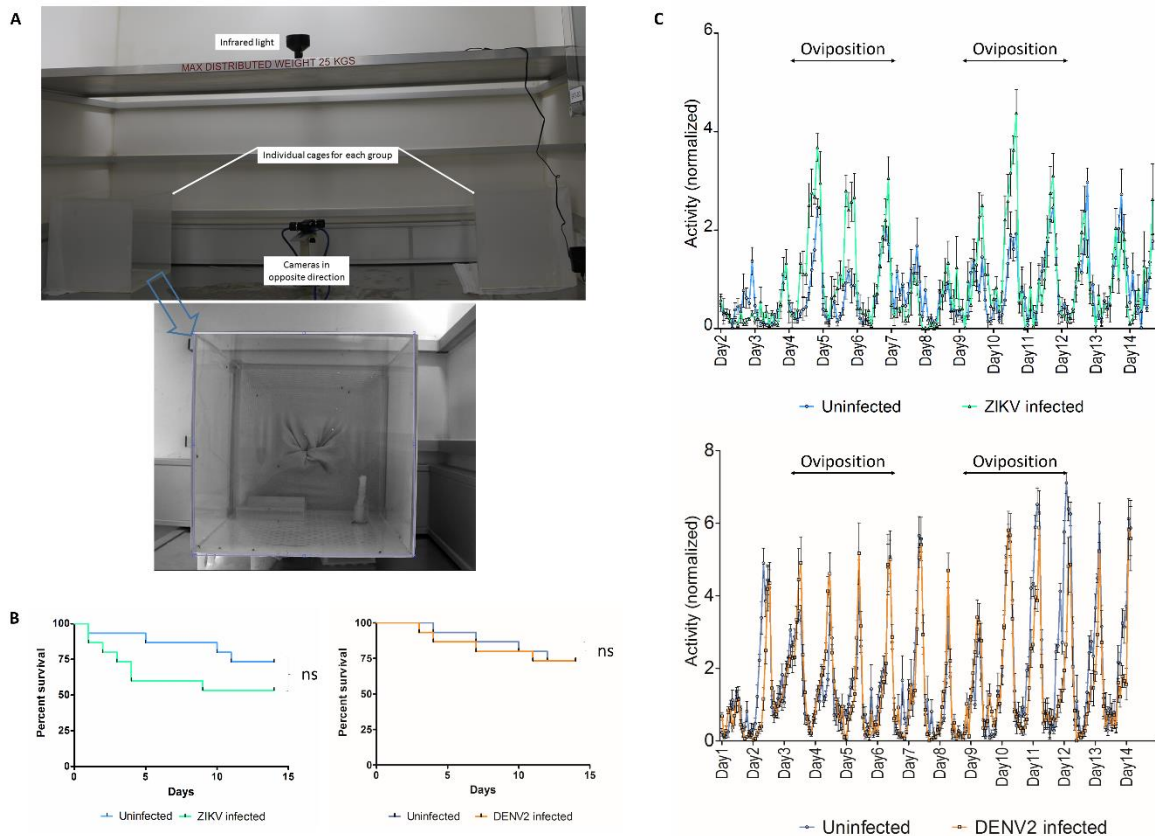

**Supplementary Figure S1. *Aedes aegypti* activity monitoring post infectious blood-feeding.** (A) Experimental set up with the two groups (uninfected and infected females) being recorded in parallel and the camera's view point before launching custom developed algorithm. (B) Survival curves of female groups with no significant differences between uninfected and ZIKV or DENV2 infected females (Gehan-Breslow-Wilcoxon Tests). (C) Raw data line charts of uninfected and ZIKV or DENV2 infected mosquito females during the day (100% light) showing 24 hours oscillations. Each data point represent one hour average of the sum of 10 minutes recording ( $\pm$ SEM). Two ZIKV and DENV2 infected groups are significantly different than uninfected with respectively  $P = 0.0142$  (Two-tailed Wilcoxon signed rank test,  $W = -2668$ ) and  $P < 0.0001$  (Two-tailed Wilcoxon signed rank test,  $W = 7342$ ).
