# Supplementary material for: Neurotropism and behavioral changes associated with Zika infection in the vector Aedes aegypti
Source: PubMed Central journal article supplement (PMC5915379; doi:10.1038/s41426-018-0069-2), 2018-04-25
Supplement: 41426_2018_69_MOESM4_ESM.pdf [file 41426_2018_69_MOESM4_ESM.pdf]

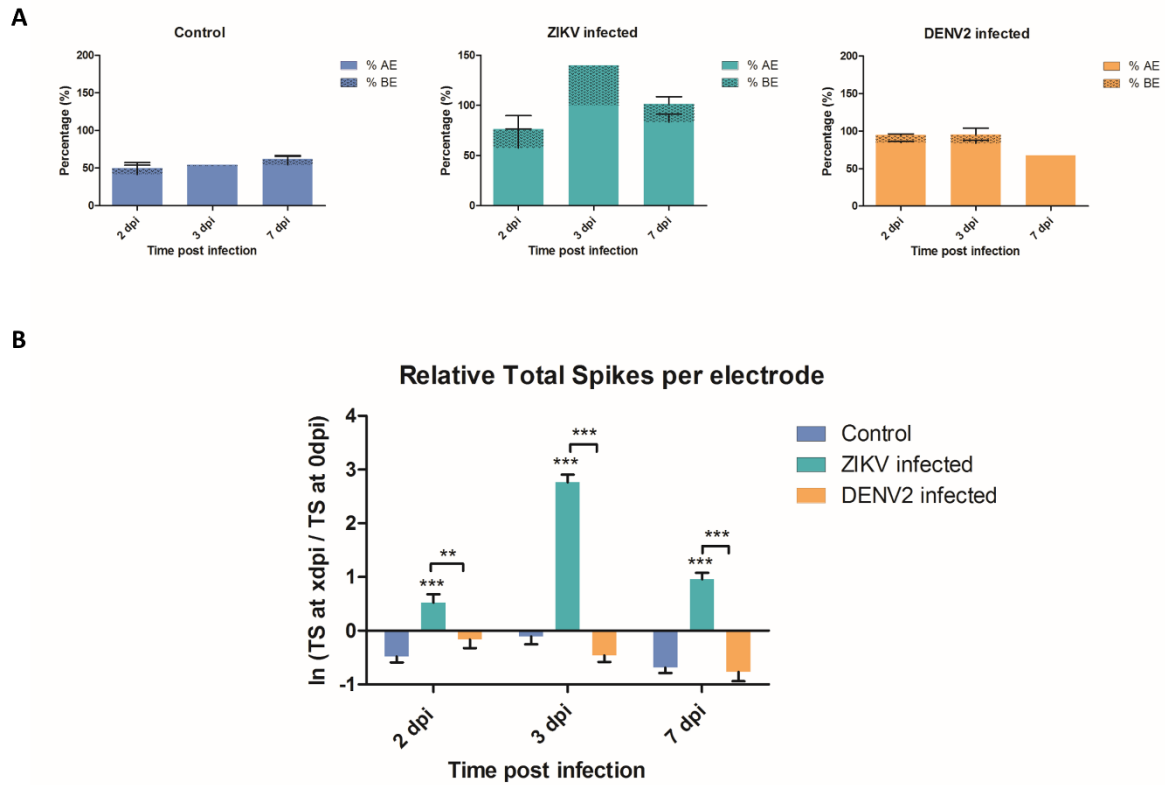

**Supplementary Figure S4. Temporal analysis of *Aedes aegypti* neuronal network spontaneous activity on microelectrode array *post* infection.** (A) Mosquito cultures bar plots representing the average proportion of Active Electrodes (AE) and Bursting electrodes (BE) per MEA for each group at different time points post ZIKV and DENV2 infections. (B) Bar plots representing the average ratio of total spike (TS) number per electrode between 0 dpi (reference) and TS number at 2, 3 and 7 dpi of spontaneous activity. All bar plots show mean value with  $\pm$ SEM and statistical tests *p*-value are indicated on top of bars when compared to uninfected value. *T*-test results are summarized in Supplementary Table S4.
