# Supplementary material for: Neurotropism and behavioral changes associated with Zika infection in the vector Aedes aegypti
Source: PubMed Central journal article supplement (PMC5915379; doi:10.1038/s41426-018-0069-2), 2018-04-25
Supplement: 41426_2018_69_MOESM5_ESM.pdf [file 41426_2018_69_MOESM5_ESM.pdf]

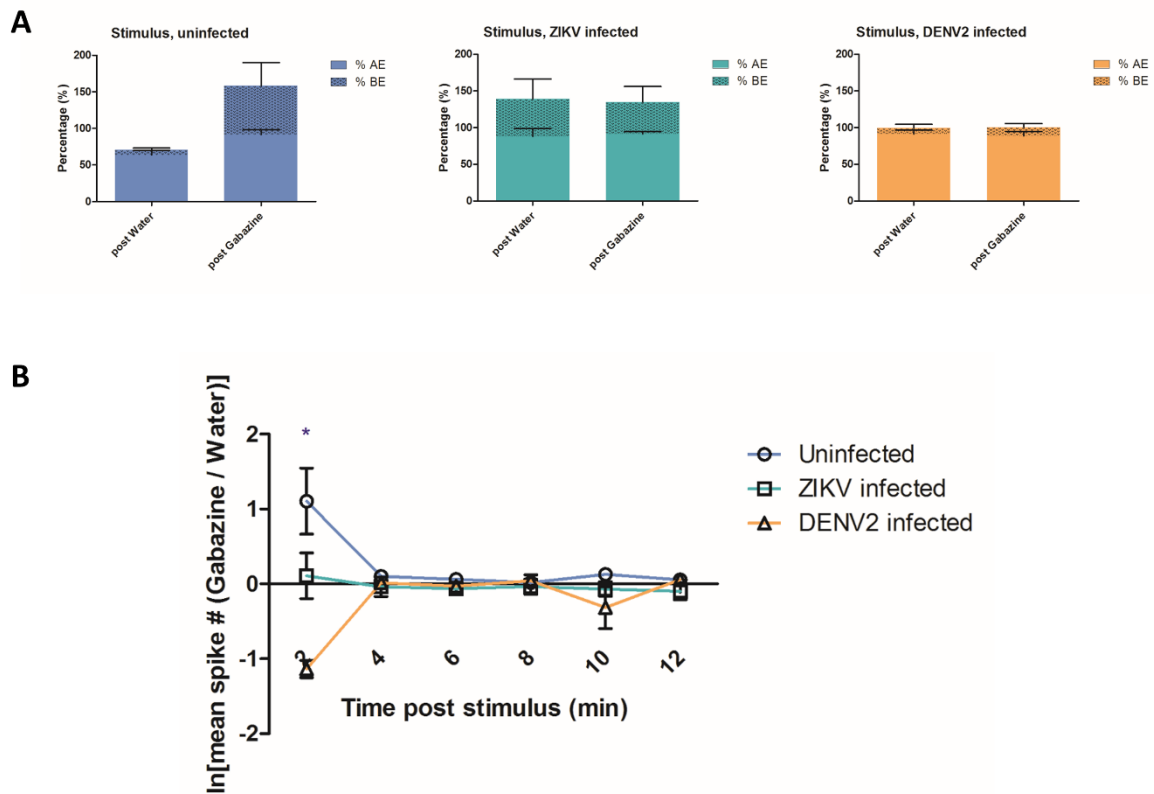

**Supplementary Figure S5. GABA<sub>A</sub> antagonist stimulus one week post infection on mosquito neuron cultures.** (A) Bar plots representing the average proportion of Active Electrodes (AE) and Bursting electrodes (BE) per MEA for each group after introduction of the solvent (TC-water) and gabazine stimulus. (B) Line charts representing the average relative change of the mean spike number per electrode between the reference (TC-water) and the introduction of gabazine at different time points. All data points show mean value with  $\pm$ SEM and statistical tests *p*-value are indicated on top of data points when significant.
