# Supplementary material for: Neurotropism and behavioral changes associated with Zika infection in the vector Aedes aegypti
Source: PubMed Central journal article supplement (PMC5915379; doi:10.1038/s41426-018-0069-2), 2018-04-25
Supplement: 41426_2018_69_MOESM8_ESM.pdf [file 41426_2018_69_MOESM8_ESM.pdf]

**Supplementary Table S1.** Average number of eggs laid by female during each experimental assay.

| EXPERIMENTAL ASSAY | Group      | NUMBER OF EGGS PER FEMALE |              |
|--------------------|------------|---------------------------|--------------|
|                    |            | Blood-meal 1              | Blood-meal 2 |
| ZIKV_1             | Uninfected | 19.5                      | 37           |
|                    | Infected   | 23.18                     | 22.4         |
| ZIKV_2             | Uninfected | 21.82                     | 21.33        |
|                    | Infected   | 17.56                     | 23.25        |
| DENV2_1            | Uninfected | 17.15                     | 71.8         |
|                    | Infected   | 23.08                     | 70.86        |
| DENV2_2            | Uninfected | 22.14                     | 31.56        |
|                    | Infected   | 10.62                     | 19.29        |
