# Supplementary material for: Neurotropism and behavioral changes associated with Zika infection in the vector Aedes aegypti
Source: PubMed Central journal article supplement (PMC5915379; doi:10.1038/s41426-018-0069-2), 2018-04-25
Supplement: 41426_2018_69_MOESM9_ESM.pdf [file 41426_2018_69_MOESM9_ESM.pdf]

**Supplementary Table S2.** Summary of statistical data analysis of mosquito neuron cultures spontaneous activity at different times post infection (Figure 2A).

| <b>Time line</b>           | <i>2 dpi</i>                                                                           | <i>3 dpi</i>                                                                          | <i>7 dpi</i>                                                                           |
|----------------------------|----------------------------------------------------------------------------------------|---------------------------------------------------------------------------------------|----------------------------------------------------------------------------------------|
| <b>Uninfected to ZIKV</b>  | $t = 5.097$ ,<br>df = 407<br>$n_{\text{uninfected}} = 179$<br>$n_{\text{ZIKV}} = 230$  | $t = 14.05$ ,<br>df = 114<br>$n_{\text{uninfected}} = 57$<br>$n_{\text{ZIKV}} = 59$   | $t = 10.61$ ,<br>df = 446<br>$n_{\text{uninfected}} = 214$<br>$n_{\text{ZIKV}} = 234$  |
|                            | $P < 0.0001$                                                                           | $P < 0.0001$                                                                          | $P < 0.0001$                                                                           |
| <b>Uninfected to DENV2</b> | $t = 1.717$ ,<br>df = 290<br>$n_{\text{uninfected}} = 179$<br>$n_{\text{DENV2}} = 113$ | $t = 1.756$ ,<br>df = 167<br>$n_{\text{uninfected}} = 57$<br>$n_{\text{DENV2}} = 112$ | $t = 0.936$ ,<br>df = 322<br>$n_{\text{uninfected}} = 214$<br>$n_{\text{DENV2}} = 110$ |
|                            | NS                                                                                     | NS                                                                                    | NS                                                                                     |
| <b>ZIKV to DENV2</b>       | $t = 2.828$ ,<br>df = 341<br>$n_{\text{ZIKV}} = 230$<br>$n_{\text{DENV2}} = 113$       | $t = 16.27$ ,<br>df = 169<br>$n_{\text{ZIKV}} = 59$<br>$n_{\text{DENV2}} = 112$       | $t = 8$ ,<br>df = 342<br>$n_{\text{ZIKV}} = 234$<br>$n_{\text{DENV2}} = 110$           |
|                            | $P = 0.005$                                                                            | $P < 0.0001$                                                                          | $P < 0.0001$                                                                           |
