# Supplementary material for: Neurotropism and behavioral changes associated with Zika infection in the vector Aedes aegypti
Source: PubMed Central journal article supplement (PMC5915379; doi:10.1038/s41426-018-0069-2), 2018-04-25
Supplement: 41426_2018_69_MOESM10_ESM.pdf [file 41426_2018_69_MOESM10_ESM.pdf]

**Supplementary Table S3.** Forward (grey background) and reverse (white background) primers for mosquito (*Aedes aegypti*) genes used for Q-PCR.

| <b><i>Aedes aegypti</i> (mosquito)</b>               |                      |
|------------------------------------------------------|----------------------|
| <b>Voltage-gated para Na channel (EU399179)</b>      | CGGATATCGCGCTTCTCAA  |
|                                                      | ATGATTGTGCTGCTCACCTG |
| <b>Glutamate dehydrogenase 1 (XM_001660812)</b>      | CGTTTCGTTCTTCGAGTGGC |
|                                                      | TTCCTGGATAGAGGCGAGCA |
| <b>EAAT (XM_001656303)</b>                           | TCGGAACCTCGTCAAGTTCG |
|                                                      | TCGGTAGCACAAATCGGGAC |
| <b>vGlut (XM_001654107)</b>                          | TTGAGGAAATCGAACGGCCA |
|                                                      | AATGATGAACCCAGGCAGG  |
| <b>GAT1 (XM_001660967)</b>                           | TCTTCATGGAAGTGGCGCTT |
|                                                      | CAGCATGACATTACGGCTGC |
| <b>GABA receptor subunit XM_001653155 (U28803.1)</b> | ACGAATGCTGCCTTACCGAA |
|                                                      | GTGGCGTATTCCAGCAGACT |
| <b>RpS17</b>                                         | AACGAAGCCCCTGCGCACAA |
|                                                      | CCTGCTCCAGGGCGGACT   |
