# Supplementary material for: Neurotropism and behavioral changes associated with Zika infection in the vector Aedes aegypti
Source: PubMed Central journal article supplement (PMC5915379; doi:10.1038/s41426-018-0069-2), 2018-04-25
Supplement: 41426_2018_69_MOESM11_ESM.pdf [file 41426_2018_69_MOESM11_ESM.pdf]

**Supplementary Table S4.** Summary of *n* used for statistical data analysis of confocal images.

|                              |                       | <i>Fig. 3C</i> | <i>Fig. 3D</i> |
|------------------------------|-----------------------|----------------|----------------|
| <i>n, images</i>             | <b>0 dpi</b>          | 7              | 6              |
|                              | <b>Uninfected</b>     | 13             | 12             |
|                              | <b>ZIKV infected</b>  | 10             | 11             |
|                              | <b>DENV2 infected</b> | 12             | 11             |
| <i>n, total cells number</i> | <b>0 dpi</b>          | 333            | 98             |
|                              | <b>Uninfected</b>     | 565            | 240            |
|                              | <b>ZIKV infected</b>  | 206            | 527            |
|                              | <b>DENV2 infected</b> | 565            | 397            |
| <i>n, coverslips</i>         | <b>0 dpi</b>          | 3              | 2              |
|                              | <b>Uninfected</b>     | 4              | 4              |
|                              | <b>ZIKV infected</b>  | 3              | 3              |
|                              | <b>DENV2 infected</b> | 3              | 3              |
